# Supplementary material for: Effectiveness of behavioural weight loss interventions delivered in a primary care setting: a systematic review and meta-analysis
Source: PubMed Central journal article supplement — Fam Pract. 2014 Oct 8;31(6):643–53. doi: 10.1093/fampra/cmu064 (PMC4240316; doi:10.1093/fampra/cmu064), 2014-10-08
Supplement: supp_cmu064_Supplementary_Information.pdf [file supp_cmu064_Supplementary_Information.pdf]

Effectiveness of behavioral weight loss interventions delivered in a primary care setting:

A Systematic Review and Meta-analysis

## SUPPORTING INFORMATION

### **Authors:**

Miss Helen P. Booth<sup>1</sup>, BSc MSc

Professor A. Toby Prevost<sup>1</sup>, BSc MSc PhD

Dr Alison J. Wright<sup>1</sup>, BSc MSc PhD

Professor Martin C. Gulliford<sup>1</sup>, FFPH FRCP

<sup>1</sup>Department of Primary Care and Public Health Sciences, King's College London

**Search terms used in for the electronic database search**

((‘anti-obesity agents’ OR ‘appetite depressants’ OR ‘sibutramine’ OR ‘orlistat’) OR (‘cognitive therapy’ OR ‘behavior therapy’)) AND (‘obesity’ OR ‘obesity, morbid’ OR ‘overweight’ OR ‘weight loss’) AND (‘clinical trial’ OR ‘controlled clinical trial’ OR ‘meta-analysis’ OR ‘randomized controlled trial’ OR ‘RCT’) AND ‘limit to year =’1990’ to present’

Table S1: Risk of bias using the Cochrane Risk of Bias Tool

| Study            | Sequence generation                                                                                                               | Allocation concealment                                                        | Blinding of ppts, personnel & outcome assessors                                                                                                                                                        | Incomplete outcome data                                                                                                                                                                                                                          | Selective outcome reporting                                                                                                                                                                                      | Other sources of bias                                       |
|------------------|-----------------------------------------------------------------------------------------------------------------------------------|-------------------------------------------------------------------------------|--------------------------------------------------------------------------------------------------------------------------------------------------------------------------------------------------------|--------------------------------------------------------------------------------------------------------------------------------------------------------------------------------------------------------------------------------------------------|------------------------------------------------------------------------------------------------------------------------------------------------------------------------------------------------------------------|-------------------------------------------------------------|
| Appel (2011)     | NO<br>"randomization was stratified according to sex and was generated in blocks of 3 and 6 with the use of a Web-based program." | UNCLEAR                                                                       | UNCLEAR<br>Blinding not discussed. Likely that no blinding was in place which could lead to observation bias                                                                                           | UNCLEAR<br>89% completion in both intervention groups, 78% in control at 12m. 100% in remote GP, 96% in in-person & 93% in control at 24m. Drop-out bigger in control groups and reasons for drop-out not given.                                 | YES<br>Only weight reported in the main paper. Secondary outcomes reported in the supplementary appendix. Protocol states that Framingham Risk Score, HOMA-IR & insulin will be reported but don't appear to be. | NO<br>No obvious issues around bias not addressed elsewhere |
| Bennett (2012)   | NO<br>"Participants were randomized to treatment arm using computer-generated allocations, blocked by clinic and sex"             | UNCLEAR<br>"computer-generated" - no further information                      | YES<br>"The trial design precluded blinding either patients or interventionists to treatment assignment" Further details of intervention in Greaney (2009). PCP heightened awareness in control group? | UNCLEAR<br>Limited information on drop-out in Figure 1. Completion 80% in intervention, 75% in control at 12m. 92% in intervention & 80% in control at 24m. Drop-out higher in control group. No significant differences found on group drop-out | UNCLEAR<br>No protocol available. Weight and SBP reported as primary & secondary outcomes in method but DBP also mentioned in results.                                                                           | NO<br>No obvious issues around bias not addressed elsewhere |
| Christian (2008) | NO<br>"Assignments to 1 of these 2 groups [control or intervention] were                                                          | UNCLEAR<br>"Assignment was concealed to the RA by a padded envelope that also | YES<br>"Neither physicians nor patients could be blinded to the intervention                                                                                                                           | UNCLEAR<br>91% of intervention & 85% of control group completed 12m. Description of reasons                                                                                                                                                      | NO<br>Protocol not available. Primary endpoint was weight loss (mean &                                                                                                                                           | NO<br>No obvious issues around bias not addressed elsewhere |

|                 |                                                                                                                             |                                                                                                                                                                |                                                                                                                |                                                                                               |                                                                                                                                                                                                                                                          |                                                                                                                                                 |
|-----------------|-----------------------------------------------------------------------------------------------------------------------------|----------------------------------------------------------------------------------------------------------------------------------------------------------------|----------------------------------------------------------------------------------------------------------------|-----------------------------------------------------------------------------------------------|----------------------------------------------------------------------------------------------------------------------------------------------------------------------------------------------------------------------------------------------------------|-------------------------------------------------------------------------------------------------------------------------------------------------|
|                 | based on a computer-generated random number sequence"                                                                       | contained a kit of baseline enrollment materials." Not clear whether these were sequentially numbered and whether the number sequence could be seen in advance | assignment". Physicians had training then saw both control and intervention participants, treatment bias risk? | behind loss restricted to 'dropped out' and 'eliminated by Data Safety and Monitoring Board'. | fraction reaching 5% loss). Secondary was change in physical activity, energy intake, & lipid and HBA1c levels. Results on these outcomes are reported.                                                                                                  |                                                                                                                                                 |
| Cohen (1991)    | UNCLEAR<br>"The residents were stratified by residency year and randomly assigned to either control or experimental groups" | UNCLEAR<br>No information given                                                                                                                                | UNCLEAR<br>No information given                                                                                | NO<br>No missing outcome data. 15 patients in each group and all completed                    | UNCLEAR<br>No protocol available. "At six and 12 months, the patients were weighed, their blood pressures were measured, and the number of antihypertensive agents prescribed was noted by the trained nurse."<br>These outcomes are covered in results. | YES<br>Trial was a cluster RCT, no obvious tailoring of the analysis to account for this. The sample sizes were very small for a cluster trial. |
| Jalkanen (1991) | UNCLEAR<br>No information given on randomization process                                                                    | UNCLEAR<br>No information given                                                                                                                                | UNCLEAR<br>No information given                                                                                | NO<br>96% of intervention & 100% of control group completed (only 50ppts).                    | UNCLEAR<br>No protocol available. Study tested an intervention for "treatment of cardiovascular risk factors, especially overweight, hypertension and high serum lipids".<br>Outcomes not                                                                | NO<br>No obvious issues around bias not addressed elsewhere                                                                                     |

|                  |                                                                                                                                                                                                        |                                                                                                                                             |                                                                                                                                                          |                                                                                                                                                                                                                                                                |                                                                                                                                                                                    |                                                             |
|------------------|--------------------------------------------------------------------------------------------------------------------------------------------------------------------------------------------------------|---------------------------------------------------------------------------------------------------------------------------------------------|----------------------------------------------------------------------------------------------------------------------------------------------------------|----------------------------------------------------------------------------------------------------------------------------------------------------------------------------------------------------------------------------------------------------------------|------------------------------------------------------------------------------------------------------------------------------------------------------------------------------------|-------------------------------------------------------------|
|                  |                                                                                                                                                                                                        |                                                                                                                                             |                                                                                                                                                          |                                                                                                                                                                                                                                                                | specified clearly.                                                                                                                                                                 |                                                             |
| Karvetti (1992)  | UNCLEAR<br>No information given on randomization process. "[Patients] selected for the study were randomly assigned to a treatment group and a control group"                                          | UNCLEAR<br>No information given                                                                                                             | UNCLEAR<br>No information given                                                                                                                          | UNCLEAR<br>74% of treatment & 82% of control group completed at 12m. "Reasons for drop-out included refusal to enter the study, loss of interest during the intervention year and relocation outside the city of Turku". Differences between groups not clear. | UNCLEAR<br>No protocol available. Outcomes not specified, but significance of changes in food & nutrient intake, weight, blood pressure and serum cholesterol reported in results. | NO<br>No obvious issues around bias not addressed elsewhere |
| Kumanyika (2012) | NO<br>"A randomization algorithm provided by a study biostatistician was electronically administered by assigning treatment group after key eligibility data were entered." Taken from Kumanyika, 2011 | UNCLEAR<br>"Random assignments were concealed from both participant and study staff prior to implementation." Doesn't explain how.          | UNCLEAR<br>No information given                                                                                                                          | UNCLEAR<br>79% of treatment & 65% of control group completed 12m. Only 7 patients reported as withdrawals from each treatment group (see figure 2).                                                                                                            | UNCLEAR<br>No protocol available. Outcomes not specifically mentioned but weight change discussed and reported.                                                                    | NO<br>No obvious issues around bias not addressed elsewhere |
| Logue (2005)     | NO<br>"Participants were randomized by opening an envelope with a set of ordered tickets indicating "TM-CD" or "Traditional" care. The (NEOUCOM)                                                       | NO<br>"Participants and research staff at each practice were blind to the assignment of patients while obtaining baseline measures, because | YES<br>"Participants were randomized by opening an envelope with a set of ordered tickets indicating "TM-CD" or "Traditional" care." Not blinded and all | UNCLEAR<br>89% of treatment and 85% of control completed 12m. 82% of treatment & 79% control completed 24m. "The majority of missing values occurred because                                                                                                   | UNCLEAR<br>No protocol available. "The main outcome measure was weight" "Other biological risk measurements included waist girths, blood                                           | NO<br>No obvious issues around bias not addressed elsewhere |

|                    |                                                                                                                                                                  |                                                                   |                                                                                                          |                                                                                                                                                                      |                                                                                                                                                                                                       |                                                                                                                                                  |
|--------------------|------------------------------------------------------------------------------------------------------------------------------------------------------------------|-------------------------------------------------------------------|----------------------------------------------------------------------------------------------------------|----------------------------------------------------------------------------------------------------------------------------------------------------------------------|-------------------------------------------------------------------------------------------------------------------------------------------------------------------------------------------------------|--------------------------------------------------------------------------------------------------------------------------------------------------|
|                    | Office of Biostatistics prepared the ordered randomization tickets using permuted blocks of 10."                                                                 | assignment envelopes were not opened until the end of the visit." | patients seen by PCPs which may have affected care of control group.                                     | participants declined further participation when an effort was made to schedule a follow-up appointment."                                                            | lipids (from a central laboratory), and blood pressures." All discussed in results but non-significant results reported without numerical data.                                                       |                                                                                                                                                  |
| Martin (2008)      | UNCLEAR<br>"Physicians were randomly assigned to provide either a tailored weight loss intervention or standard care."                                           | UNCLEAR<br>No information given                                   | UNCLEAR<br>No information given                                                                          | UNCLEAR<br>71% of treatment and 88% of control completed 12m. Poor description of the withdrawals but higher number in treatment group.                              | NO<br>No protocol available. Weight at follow-up visits was primary outcome.                                                                                                                          | NO<br>Clustering as a result of physician-randomisation was considered in the statistical analyses. Sample sizes were small for a cluster trial. |
| Mayer-Davis (2004) | UNCLEAR<br>No information given on the randomization process. "Of the 664 potential participants contacted by phone, 143 (21.5%) were randomized into the study" | UNCLEAR<br>No information given                                   | UNCLEAR<br>No information given                                                                          | UNCLEAR<br>"Of the 187 participants, 152 (81%) were retained through the 12-month end-of-study measurement visit." No information how many from each group withdrew. | NO<br>No protocol available. "The primary outcome was weight loss."<br>"Secondary outcomes included HbA1c (marker of glycemic control), lipid profile, and blood pressure." All presented in results. | NO<br>No obvious issues around bias not addressed elsewhere                                                                                      |
| Moore (2003)       | NO<br>"patient level characteristics (body mass index at recruitment, age, and sex) and practice                                                                 | UNCLEAR<br>No information given                                   | YES<br>"Patients were not aware of the intervention status of their practice, and researchers collecting | UNCLEAR<br>67% of treatment and control groups completed to 12m. Reasons for withdrawal not                                                                          | NO<br>No protocol available. "The primary outcome measure was difference in mean                                                                                                                      | NO<br>Cluster RCT "We analysed change [in outcomes] to account for both within cluster and                                                       |

|                 |                                                                                                                                                                                                                                        |                                 |                                                                                                                                                                                                                                                   |                                                                                                                                       |                                                                                                                                                                                                                     |                                                             |
|-----------------|----------------------------------------------------------------------------------------------------------------------------------------------------------------------------------------------------------------------------------------|---------------------------------|---------------------------------------------------------------------------------------------------------------------------------------------------------------------------------------------------------------------------------------------------|---------------------------------------------------------------------------------------------------------------------------------------|---------------------------------------------------------------------------------------------------------------------------------------------------------------------------------------------------------------------|-------------------------------------------------------------|
|                 | level characteristics (practice size, socioeconomic status, and existence of dietetic service) were used to inform randomisation."                                                                                                     |                                 | outcome measurements from patients were blind to the intervention status of the practices, both before and after the intervention. Double blinding was not possible in this trial." Control practice staff may have treated patients differently. | discussed.                                                                                                                            | weight of patients." Also measured "knowledge of obesity management and self-reported behaviour in consultations by staff."                                                                                         | between cluster variation"                                  |
| Munsch (2003)   | UNCLEAR<br>"Patients from general practices (n =70) were randomised into either treatment (GP BASEL) or control (GP control) groups with a ratio of 3 to 2."                                                                           | UNCLEAR<br>No information given | UNCLEAR<br>No information given                                                                                                                                                                                                                   | YES<br>77% of treatment group & 47% of control completed to 12m. Reasons for withdrawal not discussed.                                | UNCLEAR<br>No protocol available. Outcome not specifically outlined though a list of instruments is given specifying that BMI was measured at baseline and endpoint.                                                | NO<br>No obvious issues around bias not addressed elsewhere |
| Rapoport (2000) | YES<br>"In the first cohort, allocation of the groups to M-CBT or S-CBT was by the toss of a coin, and in the subsequent cohorts the allocation alternated, to ensure that both treatment types were represented at both times of day" | UNCLEAR<br>No information given | UNCLEAR<br>Not clear whether leaders of the intervention and control group sessions are the same people.                                                                                                                                          | UNCLEAR<br>81% of treatment & 74% of control group completed 12m. Reasons for withdrawal only given up to 24 week assessment not 12m. | NO<br>No protocol available. Outcomes were weight & body fat, fasting lipids & glucose, blood pressure, psychological measures, eating behaviour & body image, diet & activity, and acceptability of treatment. All | NO<br>No obvious issues around bias not addressed elsewhere |

|               |                                                                                                                                                                                                                         |                                 |                                                                                                                                                                                                                                   |                                                                                                                                                                                                                 |                                                                                                                                                                     |                                                             |
|---------------|-------------------------------------------------------------------------------------------------------------------------------------------------------------------------------------------------------------------------|---------------------------------|-----------------------------------------------------------------------------------------------------------------------------------------------------------------------------------------------------------------------------------|-----------------------------------------------------------------------------------------------------------------------------------------------------------------------------------------------------------------|---------------------------------------------------------------------------------------------------------------------------------------------------------------------|-------------------------------------------------------------|
|               |                                                                                                                                                                                                                         |                                 |                                                                                                                                                                                                                                   |                                                                                                                                                                                                                 | reported in results.                                                                                                                                                |                                                             |
| Ross (2012)   | NO<br>"Eligible participants were randomized on the basis of a computer-automated randomization sequence after the acquisition of primary outcome data. Randomization was stratified by sex, age, and WC"               | UNCLEAR<br>No information given | YES<br>"It was not possible to conceal the group assignment from the patients or the physicians."<br>Intervention delivered by health educators but PCP's knew which group their patients were in which may have influenced care. | NO<br>76% of treatment group & 85% of control completed 24m. Reasons for withdrawal presented in Figure 1 and seem broadly similar.                                                                             | UNCLEAR<br>No protocol available. Primary outcome was waist circumference. Secondary outcomes were "common metabolic risk factors".                                 | NO<br>No obvious issues around bias not addressed elsewhere |
| Wadden (2011) | NO<br>"Participants were randomly assigned to interventions (in equal numbers) with the use of a computer-generated algorithm that was operated by the Investigational Drug Service at the University of Pennsylvania." | UNCLEAR<br>No information given | UNCLEAR<br>No information given                                                                                                                                                                                                   | UNCLEAR<br>At 12m 85% & 86% of treatment groups & 84% of control groups completed. At 24m 85% & 88% of treatment groups & 85% of control groups completed. Withdrawal reasons not separated by treatment group. | NO<br>Protocol states weight as primary outcome. Secondary outcomes are waist circumference, blood pressure & pulse & biochemical measurements. Reported in results | NO<br>No obvious issues around bias not addressed elsewhere |
